# Supplementary material
Source: Springer Nature journal article supplement (https://www.springermedizin.de/resource/supplementary/12885_2012_3744_MOESM1_ESM.pdf/9464324)
Supplement: MOESM1 [file 9464324]

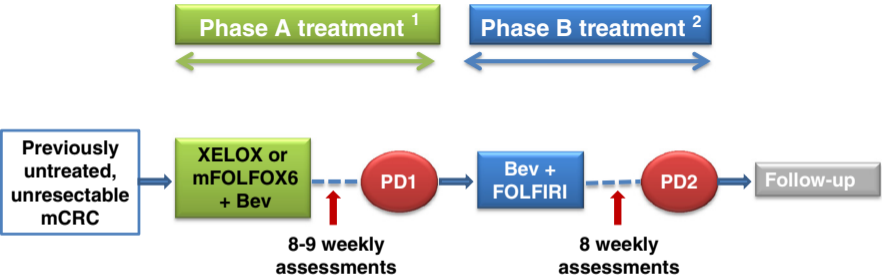

<sup>1</sup> If oxaliplatin must be discontinued, fluoropyrimidine + bevacizumab should be continued until 1<sup>st</sup> disease progression

<sup>2</sup> If irinotecan must be discontinued, fluoropyrimidine + bevacizumab should be continued until 2<sup>nd</sup> disease progression
